# Supplementary material for: Surface pressure of liquid interfaces laden with micron-sized particles
Source: Royal Society of Chemistry journal article supplement (doi:10.1039/d0sm01229g), 2020-01-01
Supplement: d0sm01229g1.pdf [file d0sm01229g1.pdf]

## Surface Pressure of Liquid Interfaces Laden with Micron-Sized Particles Electronic Supplementary Information

R. Mears, I. Muntz and J. H. J. Thijssen\*  
SUPA School of Physics & Astronomy, The University of Edinburgh,  
Edinburgh, EH9 3FD, Scotland, United Kingdom  
(Dated: September 11, 2020)

### THEORY

#### Surface pressure: derivation in canonical ensemble

In the main text, we obtained an expression for the surface pressure  $\Pi$ , in two dimensions, via an analogy with the osmotic pressure of a suspension in three dimensions. Here, we derive an expression for the surface pressure of a particle-laden interface in the canonical ensemble, starting from the (canonical) free energy  $F$  of the particle-laden interface.

In analogy with the derivation for the surface tension of surfactant solutions [1], we start with the following expression for particles at liquid interfaces:

$$F(A, T, N) = Af(T, N) , \quad (1)$$

where  $F$  is the (canonical) free energy of the interface,  $A$  the area of the interface available to the particles,  $T$  the temperature and  $N$  the number of interfacial particles. Note that  $f(T, N)$  is a free-energy density, i.e. free energy per unit area, so it is counter-intuitive that it depends on the total number of interfacial particles  $N$ . This inconsistency stems from  $N$  being an extensive variable, whereas  $T$  and the chemical potential  $\mu$  (the variables of the free-energy density in the grand-canonical ensemble) are both intensive variables. An intensive variable related to  $N$  is the particle number density:

$$\rho = \frac{N}{A} , \quad (2)$$

so we suggest:

$$F(A, T, N) = Af(T, \rho) . \quad (3)$$

For the full differential of the canonical free energy, we can write [1, 2]:

$$dF = \gamma dA - SdT + \mu dN . \quad (4)$$

From equation (3), we obtain:

$$\begin{aligned} dF &= f dA + A df \\ &= f dA + A \left( \frac{\partial f}{\partial T} \right)_{A, \rho} dT + \\ &+ A \left( \frac{\partial f}{\partial \rho} \right)_{A, T} d\rho . \end{aligned} \quad (5)$$

To compare terms in equations (4) and (5) like for like, we have to write  $d\rho$  in terms of  $dN$  and  $dA$ :

$$\begin{aligned} d\rho &= \left( \frac{\partial \rho}{\partial N} \right)_{A, T} dN + \left( \frac{\partial \rho}{\partial A} \right)_{N, T} dA \\ &= \frac{dN}{A} - \frac{\rho dA}{A} . \end{aligned} \quad (6)$$

Substituting equation (6) into equation (5), we get:

$$\begin{aligned} dF &= f dA + A \left( \frac{\partial f}{\partial T} \right)_{A, \rho} dT \\ &+ A \left( \frac{\partial f}{\partial \rho} \right)_{A, T} \left( \frac{dN}{A} - \frac{\rho dA}{A} \right) \\ &= \left( f - \rho \left( \frac{\partial f}{\partial \rho} \right)_{A, T} \right) dA + A \left( \frac{\partial f}{\partial T} \right)_{A, \rho} dT \\ &+ \left( \frac{\partial f}{\partial \rho} \right)_{A, T} dN . \end{aligned} \quad (7)$$

Now, we can compare terms like for like between equations (4) and (7), resulting in:

$$\begin{aligned} \left( \frac{\partial f}{\partial T} \right)_{A, \rho} &= -\frac{S}{A} \\ \left( \frac{\partial f}{\partial \rho} \right)_{A, T} &= \mu = \left( \frac{\partial F}{\partial N} \right)_{A, T} \\ \gamma &= f - \rho \left( \frac{\partial f}{\partial \rho} \right)_{A, T} , \end{aligned} \quad (8)$$

where the right-hand side of the second row employs the definition of chemical potential in the canonical ensemble [2]. Combining rows 2 and 3 of equation (8), we get an expression for the effective interfacial tension  $\gamma$  of a colloid-laden interface in the canonical ensemble:

$$\gamma = f - \rho \mu . \quad (9)$$

Typically, we are interested in the surface pressure of the colloid-laden interface, which in the canonical ensemble is then:

$$\Pi = \gamma_0 - \gamma = \gamma_0 - f + \rho \mu . \quad (10)$$

Note that equation (10) here is equivalent to equation (5) in the main text.

---

\* j.h.j.thijssen@ed.ac.uk;  
www.ph.ed.ac.uk/people/job-thijssen

- [1] M. Doi, in *Soft Matter Physics* (Oxford University Press, Oxford, 2015) Chap. 4, pp. 51 – 73.
- [2] C. Kittel and H. Kroemer, *Thermal Physics* (W. H. Freeman and Company, New York, 1999).
