# Supplementary material for: Surface pressure of liquid interfaces laden with micron-sized particles
Source: Royal Society of Chemistry journal article supplement (doi:10.1039/d0sm01229g), 2020-01-01
Supplement: d0sm01229g2.zip [file d0sm01229g2.zip]

## Sheet: Sheet1
surface fraction	\eps_pp	r / r_p	\eps_pp	\eps_pp
[]	10^5 kT	[]	10^5 kT	a_p \gamma_0
0.143642	0	5.27702	0	0
0.143697	0.000142016	5.27602	0.000142016	1.79724e-06
0.143788	0.000338615	5.27435	0.000338615	4.28522e-06
0.143879	0.000613123	5.27268	0.000613123	7.75917e-06
0.14397	0.000886666	5.27101	0.000886666	1.12209e-05
0.144062	0.00127674	5.26934	0.00127674	1.61573e-05
0.144162	0.00174719	5.2675	0.00174719	2.2111e-05
0.144254	0.00213431	5.26582	0.00213431	2.70101e-05
0.144346	0.00255902	5.26415	0.00255902	3.23848e-05
0.144437	0.00302112	5.26248	0.00302112	3.82328e-05
0.14452	0.00347059	5.26097	0.00347059	4.39208e-05
0.144612	0.0039683	5.25929	0.0039683	5.02194e-05
0.144714	0.00438609	5.25745	0.00438609	5.55067e-05
0.144806	0.00453287	5.25577	0.00453287	5.73641e-05
0.144898	0.0044864	5.2541	0.0044864	5.67761e-05
0.144991	0.00432466	5.25242	0.00432466	5.47293e-05
0.145074	0.00421414	5.25091	0.00421414	5.33306e-05
0.145167	0.00409174	5.24923	0.00409174	5.17816e-05
0.14526	0.00400804	5.24755	0.00400804	5.07224e-05
0.145353	0.00407748	5.24587	0.00407748	5.16011e-05
0.145446	0.00433741	5.24419	0.00433741	5.48906e-05
0.14554	0.00478683	5.24251	0.00478683	6.0578e-05
0.145633	0.00542475	5.24083	0.00542475	6.8651e-05
0.145736	0.00624903	5.23898	0.00624903	7.90824e-05
0.145829	0.00710931	5.2373	0.00710931	8.99694e-05
0.145923	0.00804221	5.23562	0.00804221	0.000101775
0.146017	0.00904733	5.23393	0.00904733	0.000114495
0.146111	0.0100866	5.23225	0.0100866	0.000127648
0.146215	0.0113083	5.2304	0.0113083	0.000143108
0.146309	0.0125651	5.22871	0.0125651	0.000159013
0.146403	0.013855	5.22703	0.013855	0.000175337
0.146498	0.0152152	5.22534	0.0152152	0.00019255
0.146592	0.0166827	5.22365	0.0166827	0.000211122
0.146687	0.0182196	5.22197	0.0182196	0.000230572
0.146782	0.0197884	5.22028	0.0197884	0.000250425
0.146877	0.0213517	5.21859	0.0213517	0.000270209
0.146972	0.0229467	5.2169	0.0229467	0.000290394
0.147067	0.0246101	5.21521	0.0246101	0.000311445
0.147172	0.0265144	5.21335	0.0265144	0.000335543
0.147268	0.0283869	5.21166	0.0283869	0.00035924
0.147363	0.0303633	5.20997	0.0303633	0.000384252
0.147459	0.0323696	5.20828	0.0323696	0.000409642
0.147555	0.0344056	5.20659	0.0344056	0.000435408
0.147661	0.0366369	5.20472	0.0366369	0.000463645
0.147757	0.0387677	5.20303	0.0387677	0.000490611
0.147853	0.0409276	5.20134	0.0409276	0.000517945
0.147949	0.0431164	5.19964	0.0431164	0.000545645
0.148046	0.045334	5.19795	0.045334	0.000573708
0.148142	0.0476165	5.19625	0.0476165	0.000602593
0.148249	0.0502374	5.19439	0.0502374	0.000635762
0.148346	0.0526839	5.19269	0.0526839	0.000666723
0.148433	0.0549762	5.19116	0.0549762	0.000695732
0.14853	0.0575145	5.18947	0.0575145	0.000727855
0.148637	0.0602963	5.1876	0.0602963	0.000763059
0.148735	0.0628162	5.1859	0.0628162	0.000794948
0.148832	0.0653272	5.1842	0.0653272	0.000826725
0.14893	0.0679011	5.1825	0.0679011	0.000859298
0.149028	0.0705018	5.1808	0.0705018	0.00089221
0.149135	0.0734696	5.17893	0.0734696	0.000929769
0.149233	0.0762648	5.17723	0.0762648	0.000965142
0.149332	0.0791214	5.17552	0.0791214	0.00100129
0.14943	0.082039	5.17382	0.082039	0.00103822
0.149528	0.0850174	5.17212	0.0850174	0.00107591
0.149637	0.0883203	5.17024	0.0883203	0.00111771
0.149726	0.0910771	5.16871	0.0910771	0.00115259
0.149824	0.0942358	5.167	0.0942358	0.00119257
0.149913	0.0971644	5.16547	0.0971644	0.00122963
0.150022	0.10077	5.16359	0.10077	0.00127525
0.150112	0.103836	5.16205	0.103836	0.00131406
0.150221	0.107647	5.16018	0.107647	0.00136228
0.150321	0.111204	5.15847	0.111204	0.0014073
0.15042	0.114783	5.15676	0.114783	0.0014526
0.15052	0.11842	5.15505	0.11842	0.00149862
0.15062	0.122183	5.15334	0.122183	0.00154624
0.15072	0.126002	5.15163	0.126002	0.00159458
0.15082	0.129878	5.14992	0.129878	0.00164362
0.15091	0.133386	5.14838	0.133386	0.00168802
0.151011	0.13727	5.14667	0.13727	0.00173717
0.151101	0.140786	5.14513	0.140786	0.00178167
0.151192	0.144291	5.14359	0.144291	0.00182602
0.151282	0.147784	5.14204	0.147784	0.00187023
0.151383	0.151688	5.14033	0.151688	0.00191963
0.151484	0.155611	5.13862	0.155611	0.00196929
0.151575	0.159162	5.13707	0.159162	0.00201422
0.151677	0.163128	5.13536	0.163128	0.00206441
0.151778	0.167081	5.13364	0.167081	0.00211443
0.15188	0.171053	5.13192	0.171053	0.00216471
0.151981	0.175114	5.13021	0.175114	0.0022161
0.152083	0.179161	5.12849	0.179161	0.00226731
0.152185	0.183193	5.12677	0.183193	0.00231834
0.152287	0.187212	5.12505	0.187212	0.00236919
0.152379	0.190816	5.1235	0.190816	0.00241481
0.152471	0.19441	5.12195	0.19441	0.00246029
0.152574	0.198356	5.12023	0.198356	0.00251022
0.152666	0.201895	5.11868	0.201895	0.00255501
0.152769	0.205815	5.11696	0.205815	0.00260461
0.152872	0.209754	5.11524	0.209754	0.00265446
0.152965	0.213318	5.11369	0.213318	0.00269957
0.153068	0.217331	5.11197	0.217331	0.00275035
0.153171	0.221363	5.11024	0.221363	0.00280138
0.153275	0.225448	5.10852	0.225448	0.00285308
0.153378	0.229618	5.10679	0.229618	0.00290585
0.153471	0.233419	5.10524	0.233419	0.00295395
0.153586	0.238157	5.10334	0.238157	0.00301391
0.153669	0.241671	5.10196	0.241671	0.00305838
0.153773	0.246082	5.10023	0.246082	0.00311421
0.153888	0.250953	5.09833	0.250953	0.00317584
0.153982	0.254954	5.09678	0.254954	0.00322648
0.154086	0.259417	5.09505	0.259417	0.00328297
0.154191	0.263931	5.09332	0.263931	0.00334009
0.154296	0.268494	5.09159	0.268494	0.00339783
0.15438	0.272186	5.0902	0.272186	0.00344456
0.154474	0.276415	5.08864	0.276415	0.00349807
0.154579	0.281163	5.08691	0.281163	0.00355816
0.154685	0.286024	5.08518	0.286024	0.00361968
0.15478	0.290473	5.08362	0.290473	0.00367598
0.154885	0.295464	5.08188	0.295464	0.00373914
0.154991	0.300503	5.08015	0.300503	0.00380291
0.155086	0.305081	5.07859	0.305081	0.00386084
0.155192	0.310215	5.07685	0.310215	0.00392581
0.155299	0.315428	5.07512	0.315428	0.00399178
0.155394	0.320104	5.07355	0.320104	0.00405096
0.15549	0.324852	5.07199	0.324852	0.00411105
0.155597	0.330142	5.07025	0.330142	0.004178
0.155704	0.335446	5.06852	0.335446	0.00424511
0.1558	0.34029	5.06695	0.34029	0.00430642
0.155907	0.345717	5.06521	0.345717	0.0043751
0.156014	0.35119	5.06347	0.35119	0.00444436
0.15611	0.356128	5.06191	0.356128	0.00450685
0.156218	0.361723	5.06016	0.361723	0.00457765
0.156315	0.36677	5.0586	0.36677	0.00464153
0.156422	0.37236	5.05685	0.37236	0.00471227
0.15652	0.377402	5.05529	0.377402	0.00477608
0.156617	0.3824	5.05372	0.3824	0.00483934
0.156725	0.387998	5.05197	0.387998	0.00491018
0.156822	0.393077	5.0504	0.393077	0.00497444
0.156942	0.39933	5.04848	0.39933	0.00505358
0.157039	0.404457	5.04691	0.404457	0.00511846
0.157137	0.409568	5.04534	0.409568	0.00518315
0.157246	0.415259	5.04359	0.415259	0.00525517
0.157355	0.420899	5.04185	0.420899	0.00532654
0.157464	0.42655	5.0401	0.42655	0.00539806
0.157563	0.431648	5.03852	0.431648	0.00546257
0.157672	0.437355	5.03678	0.437355	0.00553479
0.157782	0.443041	5.03503	0.443041	0.00560676
0.15787	0.447676	5.03363	0.447676	0.00566541
0.157979	0.453605	5.03187	0.453605	0.00574044
0.158089	0.459605	5.03012	0.459605	0.00581638
0.1582	0.465616	5.02837	0.465616	0.00589244
0.158299	0.471063	5.02679	0.471063	0.00596137
0.158398	0.476575	5.02522	0.476575	0.00603113
0.15852	0.483322	5.02329	0.483322	0.00611652
0.158631	0.489495	5.02153	0.489495	0.00619463
0.158731	0.49506	5.01995	0.49506	0.00626505
0.158842	0.501313	5.0182	0.501313	0.00634419
0.158942	0.506978	5.01662	0.506978	0.00641588
0.159042	0.512679	5.01503	0.512679	0.00648803
0.159142	0.518417	5.01345	0.518417	0.00656065
0.159265	0.525505	5.01152	0.525505	0.00665034
0.159366	0.531393	5.00994	0.531393	0.00672486
0.159478	0.538004	5.00818	0.538004	0.00680852
0.159579	0.543962	5.00659	0.543962	0.00688392
0.159691	0.550619	5.00483	0.550619	0.00696817
0.159804	0.557314	5.00307	0.557314	0.00705289
0.159905	0.563373	5.00149	0.563373	0.00712957
0.160018	0.570142	4.99972	0.570142	0.00721523
0.160119	0.576323	4.99814	0.576323	0.00729345
0.160232	0.583226	4.99637	0.583226	0.00738081
0.160345	0.590195	4.99461	0.590195	0.007469
0.160447	0.596527	4.99302	0.596527	0.00754913
0.160572	0.604335	4.99108	0.604335	0.00764795
0.160675	0.610729	4.98949	0.610729	0.00772887
0.160777	0.617184	4.9879	0.617184	0.00781055
0.16088	0.623697	4.98631	0.623697	0.00789298
0.161005	0.631694	4.98437	0.631694	0.00799418
0.161119	0.638997	4.9826	0.638997	0.0080866
0.161222	0.645601	4.98101	0.645601	0.00817017
0.161326	0.652237	4.97942	0.652237	0.00825415
0.161429	0.658852	4.97782	0.658852	0.00833787
0.161555	0.66694	4.97587	0.66694	0.00844022
0.161659	0.673561	4.97428	0.673561	0.00852401
0.161774	0.68101	4.97251	0.68101	0.00861828
0.161889	0.688491	4.97074	0.688491	0.00871295
0.161993	0.695228	4.96914	0.695228	0.00879821
0.162109	0.702746	4.96737	0.702746	0.00889336
0.162225	0.710267	4.96559	0.710267	0.00898853
0.162329	0.717066	4.964	0.717066	0.00907457
0.162446	0.724623	4.96222	0.724623	0.00917021
0.162562	0.73224	4.96044	0.73224	0.00926661
0.162678	0.739917	4.95867	0.739917	0.00936376
0.162783	0.74683	4.95707	0.74683	0.00945124
0.1629	0.754542	4.95529	0.754542	0.00954884
0.163006	0.761512	4.95369	0.761512	0.00963704
0.163123	0.769287	4.95191	0.769287	0.00973544
0.163228	0.776338	4.95031	0.776338	0.00982468
0.163346	0.784204	4.94853	0.784204	0.00992422
0.163463	0.792071	4.94675	0.792071	0.0100238
0.163581	0.799938	4.94496	0.799938	0.0101233
0.163699	0.807862	4.94318	0.807862	0.0102236
0.163817	0.815731	4.9414	0.815731	0.0103232
0.163936	0.823571	4.93962	0.823571	0.0104224
0.164054	0.831412	4.93783	0.831412	0.0105216
0.164161	0.838446	4.93623	0.838446	0.0106107
0.164268	0.845407	4.93462	0.845407	0.0106988
0.164375	0.852345	4.93301	0.852345	0.0107866
0.164494	0.860028	4.93122	0.860028	0.0108838
0.164613	0.867712	4.92944	0.867712	0.010981
0.164721	0.874629	4.92783	0.874629	0.0110686
0.164841	0.882373	4.92604	0.882373	0.0111666
0.164948	0.889319	4.92443	0.889319	0.0112545
0.16508	0.897839	4.92246	0.897839	0.0113623
0.165189	0.904836	4.92085	0.904836	0.0114508
0.165309	0.912584	4.91906	0.912584	0.0115489
0.165417	0.919609	4.91745	0.919609	0.0116378
0.165538	0.927443	4.91565	0.927443	0.0117369
0.165659	0.935304	4.91386	0.935304	0.0118364
0.165768	0.942431	4.91225	0.942431	0.0119266
0.165889	0.950432	4.91045	0.950432	0.0120279
0.16601	0.958515	4.90866	0.958515	0.0121301
0.166119	0.96584	4.90704	0.96584	0.0122228
0.166229	0.973166	4.90543	0.973166	0.0123156
0.166351	0.981332	4.90363	0.981332	0.0124189
0.166473	0.989552	4.90183	0.989552	0.0125229
0.166595	0.997797	4.90003	0.997797	0.0126273
0.166717	1.00612	4.89823	1.00612	0.0127326
0.166828	1.01366	4.89662	1.01366	0.0128281
0.166938	1.0212	4.895	1.0212	0.0129235
0.167061	1.02956	4.8932	1.02956	0.0130292
0.167184	1.0379	4.89139	1.0379	0.0131348
0.167307	1.04625	4.88959	1.04625	0.0132404
0.167418	1.05376	4.88797	1.05376	0.0133355
0.167542	1.06215	4.88617	1.06215	0.0134417
0.167666	1.0706	4.88436	1.0706	0.0135486
0.16779	1.07907	4.88256	1.07907	0.0136558
0.167901	1.08672	4.88093	1.08672	0.0137526
0.168026	1.09524	4.87913	1.09524	0.0138604
0.16815	1.10378	4.87732	1.10378	0.0139685
0.168275	1.11232	4.87552	1.11232	0.0140766
0.168387	1.12001	4.87389	1.12001	0.0141738
0.168525	1.12939	4.8719	1.12939	0.0142926
0.168637	1.13709	4.87027	1.13709	0.0143901
0.168763	1.14567	4.86846	1.14567	0.0144987
0.168876	1.15339	4.86683	1.15339	0.0145963
0.169014	1.16282	4.86484	1.16282	0.0147157
0.169127	1.17051	4.86321	1.17051	0.014813
0.169254	1.17897	4.8614	1.17897	0.01492
0.16938	1.18729	4.85958	1.18729	0.0150254
0.169506	1.19559	4.85777	1.19559	0.0151303
0.169633	1.20388	4.85596	1.20388	0.0152353
0.16976	1.21219	4.85414	1.21219	0.0153405
0.169874	1.21974	4.85251	1.21974	0.015436
0.170001	1.22823	4.85069	1.22823	0.0155435
0.170129	1.23682	4.84887	1.23682	0.0156522
0.170257	1.24551	4.84706	1.24551	0.0157621
0.170372	1.25342	4.84542	1.25342	0.0158623
0.1705	1.26226	4.8436	1.26226	0.0159741
0.170628	1.27117	4.84178	1.27117	0.0160869
0.170743	1.27921	4.84014	1.27921	0.0161886
0.170859	1.28727	4.8385	1.28727	0.0162906
0.170988	1.29624	4.83668	1.29624	0.0164042
0.171129	1.30611	4.83468	1.30611	0.016529
0.171246	1.31417	4.83304	1.31417	0.016631
0.171362	1.32225	4.8314	1.32225	0.0167333
0.171504	1.33215	4.82939	1.33215	0.0168586
0.171634	1.34115	4.82757	1.34115	0.0169724
0.171751	1.34926	4.82592	1.34926	0.0170751
0.171868	1.35744	4.82428	1.35744	0.0171785
0.171985	1.36568	4.82263	1.36568	0.0172829
0.172116	1.37488	4.82081	1.37488	0.0173993
0.172246	1.38412	4.81898	1.38412	0.0175163
0.172364	1.39249	4.81733	1.39249	0.0176221
0.172495	1.40179	4.8155	1.40179	0.0177399
0.172626	1.41109	4.81367	1.41109	0.0178576
0.172745	1.41946	4.81203	1.41946	0.0179634
0.172876	1.42877	4.81019	1.42877	0.0180813
0.173008	1.43812	4.80836	1.43812	0.0181996
0.17314	1.44749	4.80653	1.44749	0.0183182
0.173259	1.45592	4.80488	1.45592	0.0184248
0.173391	1.46534	4.80304	1.46534	0.0185442
0.17351	1.4738	4.80139	1.4738	0.0186512
0.173643	1.48324	4.79956	1.48324	0.0187707
0.173776	1.49272	4.79772	1.49272	0.0188906
0.173896	1.50129	4.79607	1.50129	0.0189991
0.174029	1.51083	4.79423	1.51083	0.0191198
0.174149	1.51948	4.79258	1.51948	0.0192292
0.174297	1.53011	4.79055	1.53011	0.0193638
0.174417	1.53887	4.7889	1.53887	0.0194746
0.174551	1.54864	4.78706	1.54864	0.0195983
0.174672	1.55748	4.7854	1.55748	0.0197101
0.174807	1.56735	4.78356	1.56735	0.0198351
0.174941	1.57727	4.78171	1.57727	0.0199606
0.175076	1.58715	4.77987	1.58715	0.0200856
0.175212	1.59692	4.77803	1.59692	0.0202092
0.175347	1.6066	4.77618	1.6066	0.0203318
0.175482	1.61623	4.77434	1.61623	0.0204536
0.175605	1.6249	4.77268	1.6249	0.0205634
0.175741	1.63458	4.77083	1.63458	0.0206859
0.175877	1.64433	4.76898	1.64433	0.0208092
0.176	1.65311	4.76732	1.65311	0.0209203
0.176136	1.6629	4.76547	1.6629	0.0210443
0.176273	1.67268	4.76362	1.67268	0.0211681
0.17641	1.68246	4.76177	1.68246	0.0212917
0.176547	1.69224	4.75992	1.69224	0.0214155
0.176685	1.70199	4.75807	1.70199	0.0215389
0.176808	1.71077	4.7564	1.71077	0.0216501
0.17696	1.72152	4.75436	1.72152	0.0217861
0.177084	1.73031	4.75269	1.73031	0.0218973
0.177223	1.74008	4.75084	1.74008	0.022021
0.177361	1.74987	4.74899	1.74987	0.0221448
0.177486	1.75869	4.74731	1.75869	0.0222565
0.177611	1.76752	4.74564	1.76752	0.0223683
0.17775	1.77735	4.74379	1.77735	0.0224926
0.177875	1.78619	4.74211	1.78619	0.0226045
0.178015	1.79597	4.74026	1.79597	0.0227283
0.178155	1.80574	4.7384	1.80574	0.0228519
0.178281	1.81454	4.73672	1.81454	0.0229633
0.178421	1.82434	4.73486	1.82434	0.0230873
0.178561	1.83422	4.733	1.83422	0.0232123
0.178688	1.84318	4.73132	1.84318	0.0233257
0.178814	1.85216	4.72965	1.85216	0.0234393
0.178955	1.86219	4.72779	1.86219	0.0235663
0.179097	1.87225	4.72592	1.87225	0.0236937
0.179252	1.88336	4.72387	1.88336	0.0238342
0.17938	1.8925	4.72219	1.8925	0.0239498
0.179507	1.90166	4.72051	1.90166	0.0240658
0.179664	1.9129	4.71846	1.9129	0.0242081
0.179792	1.92211	4.71678	1.92211	0.0243246
0.17992	1.93133	4.71509	1.93133	0.0244412
0.180063	1.9416	4.71322	1.9416	0.0245712
0.180191	1.95085	4.71154	1.95085	0.0246884
0.180334	1.96117	4.70967	1.96117	0.0248189
0.180478	1.97152	4.7078	1.97152	0.0249498
0.180622	1.98187	4.70593	1.98187	0.0250808
0.180751	1.99122	4.70424	1.99122	0.0251992
0.180881	2.00053	4.70256	2.00053	0.0253171
0.181025	2.01085	4.70068	2.01085	0.0254476
0.181155	2.02008	4.69899	2.02008	0.0255644
0.1813	2.03027	4.69712	2.03027	0.0256934
0.181445	2.04045	4.69524	2.04045	0.0258222
0.181575	2.04958	4.69355	2.04958	0.0259378
0.181721	2.05964	4.69168	2.05964	0.0260651
0.181866	2.06974	4.6898	2.06974	0.0261928
0.181997	2.07885	4.68811	2.07885	0.0263081
0.182143	2.08896	4.68623	2.08896	0.0264361
0.18229	2.09912	4.68434	2.09912	0.0265647
0.182436	2.10929	4.68246	2.10929	0.0266934
0.182583	2.11949	4.68058	2.11949	0.0268224
0.182715	2.12869	4.67889	2.12869	0.0269389
0.182863	2.13895	4.677	2.13895	0.0270688
0.182995	2.14819	4.67531	2.14819	0.0271857
0.183143	2.15849	4.67342	2.15849	0.027316
0.183291	2.16884	4.67154	2.16884	0.027447
0.183439	2.17921	4.66965	2.17921	0.0275783
0.183587	2.18959	4.66776	2.18959	0.0277096
0.183721	2.19894	4.66606	2.19894	0.027828
0.183855	2.20828	4.66436	2.20828	0.0279461
0.184004	2.21869	4.66247	2.21869	0.0280778
0.184153	2.22912	4.66058	2.22912	0.0282098
0.184288	2.23851	4.65888	2.23851	0.0283287
0.184423	2.24791	4.65718	2.24791	0.0284476
0.184573	2.25838	4.65529	2.25838	0.0285802
0.184723	2.26886	4.65339	2.26886	0.0287128
0.184873	2.27932	4.6515	2.27932	0.0288452
0.185024	2.28972	4.6496	2.28972	0.0289767
0.18516	2.29899	4.6479	2.29899	0.029094
0.185311	2.30913	4.646	2.30913	0.0292224
0.185462	2.31922	4.6441	2.31922	0.0293501
0.185599	2.32827	4.6424	2.32827	0.0294646
0.185751	2.33834	4.6405	2.33834	0.0295921
0.185903	2.34845	4.6386	2.34845	0.02972
0.18604	2.35755	4.63689	2.35755	0.0298351
0.186193	2.36769	4.63499	2.36769	0.0299635
0.18633	2.37688	4.63328	2.37688	0.0300798
0.186483	2.38718	4.63137	2.38718	0.0302101
0.186621	2.3965	4.62966	2.3965	0.030328
0.186775	2.40692	4.62776	2.40692	0.0304599
0.186944	2.41845	4.62566	2.41845	0.0306058
0.187083	2.42791	4.62395	2.42791	0.0307255
0.187237	2.43842	4.62204	2.43842	0.0308586
0.187376	2.44791	4.62033	2.44791	0.0309786
0.187531	2.45841	4.61842	2.45841	0.0311115
0.187671	2.46783	4.6167	2.46783	0.0312307
0.187826	2.47829	4.61479	2.47829	0.0313631
0.187982	2.48874	4.61288	2.48874	0.0314953
0.188137	2.49916	4.61097	2.49916	0.0316273
0.188294	2.50959	4.60906	2.50959	0.0317593
0.18845	2.51988	4.60715	2.51988	0.0318894
0.188606	2.53014	4.60523	2.53014	0.0320193
0.188748	2.5394	4.60351	2.5394	0.0321365
0.188889	2.54869	4.60179	2.54869	0.032254
0.189031	2.558	4.60007	2.558	0.0323718
0.189172	2.56733	4.59834	2.56733	0.0324899
0.189346	2.57874	4.59623	2.57874	0.0326343
0.189504	2.58911	4.59431	2.58911	0.0327655
0.189647	2.59844	4.59259	2.59844	0.0328837
0.189789	2.60778	4.59086	2.60778	0.0330019
0.189932	2.6172	4.58913	2.6172	0.0331211
0.190091	2.62769	4.58721	2.62769	0.0332539
0.190235	2.63714	4.58548	2.63714	0.0333734
0.190378	2.64653	4.58375	2.64653	0.0334922
0.190538	2.65692	4.58183	2.65692	0.0336238
0.190682	2.66627	4.5801	2.66627	0.033742
0.190843	2.67664	4.57818	2.67664	0.0338733
0.190987	2.68603	4.57644	2.68603	0.0339921
0.191132	2.69547	4.57471	2.69547	0.0341115
0.191293	2.706	4.57278	2.706	0.0342448
0.191454	2.71655	4.57086	2.71655	0.0343783
0.191616	2.72714	4.56893	2.72714	0.0345124
0.191778	2.73777	4.567	2.73777	0.0346469
0.191924	2.74736	4.56526	2.74736	0.0347683
0.19207	2.75695	4.56352	2.75695	0.0348897
0.192233	2.76763	4.56159	2.76763	0.0350248
0.192396	2.7783	4.55966	2.7783	0.0351599
0.192542	2.78791	4.55792	2.78791	0.0352815
0.19269	2.79754	4.55618	2.79754	0.0354033
0.19287	2.80928	4.55405	2.80928	0.0355519
0.193034	2.81996	4.55212	2.81996	0.035687
0.193182	2.82956	4.55037	2.82956	0.0358085
0.193346	2.84019	4.54844	2.84019	0.0359431
0.193494	2.84974	4.54669	2.84974	0.0360639
0.19366	2.8602	4.54476	2.8602	0.0361962
0.193808	2.86946	4.54301	2.86946	0.0363134
0.193991	2.88062	4.54088	2.88062	0.0364547
0.19414	2.88974	4.53913	2.88974	0.0365701
0.194306	2.89991	4.53719	2.89991	0.0366988
0.194456	2.90908	4.53544	2.90908	0.0368148
0.194623	2.91933	4.5335	2.91933	0.0369445
0.19479	2.92966	4.53155	2.92966	0.0370752
0.19494	2.93902	4.5298	2.93902	0.0371938
0.195125	2.95053	4.52766	2.95053	0.0373394
0.195276	2.96002	4.52591	2.96002	0.0374595
0.195444	2.97062	4.52396	2.97062	0.0375936
0.195595	2.98021	4.52221	2.98021	0.037715
0.195764	2.99088	4.52026	2.99088	0.0378501
0.195933	3.00159	4.51831	3.00159	0.0379856
0.196086	3.01123	4.51655	3.01123	0.0381076
0.196238	3.02085	4.5148	3.02085	0.0382293
0.196408	3.03152	4.51285	3.03152	0.0383643
0.196578	3.04216	4.51089	3.04216	0.038499
0.196748	3.05284	4.50894	3.05284	0.0386341
0.196902	3.06246	4.50718	3.06246	0.0387559
0.19709	3.07424	4.50503	3.07424	0.038905
0.197244	3.08393	4.50327	3.08393	0.0390276
0.197416	3.09475	4.50131	3.09475	0.0391645
0.197588	3.1056	4.49935	3.1056	0.0393018
0.197743	3.11538	4.49759	3.11538	0.0394256
0.197915	3.12628	4.49563	3.12628	0.0395636
0.198088	3.13716	4.49367	3.13716	0.0397012
0.198244	3.14693	4.4919	3.14693	0.0398248
0.198417	3.15778	4.48994	3.15778	0.0399621
0.19859	3.16864	4.48798	3.16864	0.0400996
0.198764	3.17948	4.48602	3.17948	0.0402368
0.198939	3.19033	4.48405	3.19033	0.0403741
0.199113	3.20117	4.48209	3.20117	0.0405113
0.199288	3.21203	4.48012	3.21203	0.0406487
0.199463	3.22288	4.47815	3.22288	0.040786
0.199621	3.23263	4.47638	3.23263	0.0409094
0.199779	3.24237	4.47461	3.24237	0.0410327
0.199937	3.25216	4.47284	3.25216	0.0411566
0.200131	3.26414	4.47067	3.26414	0.0413082
0.200308	3.27479	4.4687	3.27479	0.041443
0.200485	3.28529	4.46672	3.28529	0.0415759
0.200644	3.29474	4.46495	3.29474	0.0416954
0.200804	3.3042	4.46317	3.3042	0.0418151
0.201	3.31573	4.461	3.31573	0.0419611
0.20116	3.32517	4.45922	3.32517	0.0420805
0.201339	3.33562	4.45724	3.33562	0.0422128
0.201517	3.34607	4.45527	3.34607	0.0423451
0.201679	3.35548	4.45349	3.35548	0.042464
0.201876	3.36692	4.45131	3.36692	0.0426088
0.20202	3.37527	4.44973	3.37527	0.0427145
0.2022	3.3857	4.44775	3.3857	0.0428465
0.202362	3.39513	4.44596	3.39513	0.0429659
0.202542	3.40568	4.44398	3.40568	0.0430994
0.202723	3.41626	4.442	3.41626	0.0432333
0.202905	3.42686	4.44001	3.42686	0.0433674
0.203068	3.43637	4.43823	3.43637	0.0434877
0.20325	3.44697	4.43624	3.44697	0.0436219
0.203432	3.45757	4.43425	3.45757	0.0437561
0.203614	3.46825	4.43227	3.46825	0.0438912
0.203797	3.47895	4.43028	3.47895	0.0440266
0.20398	3.48968	4.42829	3.48968	0.0441624
0.204146	3.49934	4.4265	3.49934	0.0442847
0.204329	3.5101	4.4245	3.5101	0.0444208
0.204495	3.51977	4.42271	3.51977	0.0445432
0.204679	3.53052	4.42072	3.53052	0.0446793
0.204864	3.5413	4.41873	3.5413	0.0448157
0.205049	3.55209	4.41673	3.55209	0.0449523
0.205216	3.56183	4.41493	3.56183	0.0450755
0.205383	3.57157	4.41314	3.57157	0.0451987
0.205569	3.58237	4.41114	3.58237	0.0453354
0.205756	3.59317	4.40914	3.59317	0.0454721
0.205924	3.60288	4.40734	3.60288	0.0455949
0.206129	3.61473	4.40514	3.61473	0.0457449
0.206298	3.62442	4.40334	3.62442	0.0458676
0.206486	3.63518	4.40134	3.63518	0.0460037
0.206674	3.64593	4.39934	3.64593	0.0461398
0.206862	3.65668	4.39734	3.65668	0.0462759
0.207051	3.66746	4.39533	3.66746	0.0464123
0.20724	3.67821	4.39333	3.67821	0.0465483
0.207429	3.68899	4.39132	3.68899	0.0466847
0.207619	3.69979	4.38931	3.69979	0.0468214
0.207809	3.71058	4.3873	3.71058	0.0469579
0.207999	3.72139	4.3853	3.72139	0.0470947
0.208171	3.73111	4.38349	3.73111	0.0472178
0.208362	3.74192	4.38148	3.74192	0.0473546
0.208554	3.75271	4.37946	3.75271	0.047491
0.208726	3.76239	4.37765	3.76239	0.0476136
0.208918	3.77313	4.37564	3.77313	0.0477495
0.209111	3.78383	4.37363	3.78383	0.0478849
0.209304	3.79452	4.37161	3.79452	0.0480202
0.209478	3.80417	4.3698	3.80417	0.0481424
0.209671	3.81491	4.36778	3.81491	0.0482783
0.209865	3.82565	4.36576	3.82565	0.0484142
0.21004	3.83534	4.36394	3.83534	0.0485368
0.210234	3.84608	4.36192	3.84608	0.0486727
0.210429	3.85682	4.3599	3.85682	0.0488087
0.210605	3.86647	4.35808	3.86647	0.0489308
0.210801	3.87714	4.35606	3.87714	0.0490658
0.210997	3.88775	4.35404	3.88775	0.0492
0.211193	3.89838	4.35201	3.89838	0.0493345
0.21139	3.90903	4.34999	3.90903	0.0494693
0.211587	3.91968	4.34796	3.91968	0.0496041
0.211784	3.93037	4.34594	3.93037	0.0497394
0.211962	3.93999	4.34411	3.93999	0.0498611
0.21216	3.95067	4.34208	3.95067	0.0499963
0.212359	3.96138	4.34005	3.96138	0.0501318
0.212558	3.97209	4.33802	3.97209	0.0502674
0.212757	3.98282	4.33599	3.98282	0.0504032
0.212956	3.99352	4.33396	3.99352	0.0505386
0.213136	4.00312	4.33213	4.00312	0.0506601
0.213317	4.01266	4.3303	4.01266	0.0507808
0.213517	4.02324	4.32826	4.02324	0.0509147
0.213718	4.03383	4.32622	4.03383	0.0510487
0.21392	4.0444	4.32419	4.0444	0.0511825
0.214122	4.05501	4.32215	4.05501	0.0513167
0.214324	4.06563	4.32011	4.06563	0.0514512
0.214506	4.07525	4.31827	4.07525	0.0515729
0.214709	4.08598	4.31623	4.08598	0.0517087
0.214912	4.09677	4.31419	4.09677	0.0518452
0.215116	4.10757	4.31215	4.10757	0.051982
0.21532	4.11838	4.3101	4.11838	0.0521187
0.215525	4.1292	4.30806	4.1292	0.0522556
0.215688	4.13787	4.30642	4.13787	0.0523653
0.215914	4.14976	4.30417	4.14976	0.0525158
0.21612	4.16059	4.30212	4.16059	0.0526529
0.216305	4.17034	4.30028	4.17034	0.0527762
0.216511	4.1812	4.29823	4.1812	0.0529138
0.216698	4.191	4.29638	4.191	0.0530378
0.216925	4.20299	4.29413	4.20299	0.0531895
0.217112	4.21279	4.29228	4.21279	0.0533135
0.21732	4.22366	4.29023	4.22366	0.053451
0.217528	4.23436	4.28817	4.23436	0.0535865
0.217716	4.24392	4.28632	4.24392	0.0537074
0.217925	4.25429	4.28427	4.25429	0.0538386
0.218135	4.26455	4.28221	4.26455	0.0539685
0.218344	4.27472	4.28015	4.27472	0.0540973
0.218555	4.28485	4.27809	4.28485	0.0542255
0.218744	4.29393	4.27624	4.29393	0.0543404
0.218934	4.30297	4.27438	4.30297	0.0544548
0.219146	4.31302	4.27232	4.31302	0.0545819
0.219336	4.3221	4.27046	4.3221	0.0546968
0.219527	4.33125	4.26861	4.33125	0.0548126
0.21974	4.34146	4.26654	4.34146	0.0549419
0.219953	4.3517	4.26447	4.3517	0.0550714
0.220145	4.36097	4.26261	4.36097	0.0551887
0.220358	4.37132	4.26055	4.37132	0.0553197
0.220572	4.38171	4.25848	4.38171	0.0554512
0.220787	4.39212	4.25641	4.39212	0.0555829
0.221002	4.40256	4.25434	4.40256	0.055715
0.221196	4.41197	4.25247	4.41197	0.0558341
0.22139	4.4214	4.25061	4.4214	0.0559535
0.221606	4.43191	4.24853	4.43191	0.0560864
0.221823	4.44239	4.24646	4.44239	0.0562192
0.22204	4.4529	4.24438	4.4529	0.0563521
0.222235	4.46228	4.24252	4.46228	0.0564708
0.222453	4.4727	4.24044	4.4727	0.0566027
0.222671	4.48315	4.23836	4.48315	0.056735
0.22289	4.49362	4.23628	4.49362	0.0568674
0.223087	4.50311	4.23441	4.50311	0.0569875
0.223307	4.51369	4.23233	4.51369	0.0571214
0.223527	4.52431	4.23024	4.52431	0.0572558
0.223747	4.53496	4.22816	4.53496	0.0573906
0.223968	4.54565	4.22607	4.54565	0.0575258
0.224189	4.55634	4.22399	4.55634	0.0576612
0.224389	4.56601	4.22211	4.56601	0.0577835
0.224611	4.57674	4.22002	4.57674	0.0579194
0.224833	4.58749	4.21794	4.58749	0.0580554
0.225034	4.59716	4.21605	4.59716	0.0581777
0.225257	4.60787	4.21396	4.60787	0.0583133
0.225481	4.61856	4.21187	4.61856	0.0584486
0.225727	4.63031	4.20957	4.63031	0.0585972
0.22593	4.63993	4.20769	4.63993	0.058719
0.226132	4.64958	4.2058	4.64958	0.0588411
0.226335	4.65924	4.20391	4.65924	0.0589634
0.226561	4.66999	4.20182	4.66999	0.0590994
0.226765	4.67969	4.19993	4.67969	0.0592222
0.226992	4.69046	4.19783	4.69046	0.0593584
0.227219	4.70124	4.19573	4.70124	0.0594948
0.227447	4.71205	4.19363	4.71205	0.0596317
0.227675	4.72287	4.19153	4.72287	0.0597687
0.227881	4.73265	4.18964	4.73265	0.0598924
0.22811	4.74351	4.18753	4.74351	0.0600299
0.228339	4.75436	4.18543	4.75436	0.0601672
0.228546	4.76407	4.18353	4.76407	0.0602901
0.228776	4.77485	4.18143	4.77485	0.0604265
0.228984	4.78453	4.17953	4.78453	0.0605489
0.229238	4.79634	4.17721	4.79634	0.0606984
0.229424	4.80495	4.17552	4.80495	0.0608074
0.229633	4.81464	4.17362	4.81464	0.06093
0.229889	4.8265	4.1713	4.8265	0.0610801
0.230122	4.83728	4.16919	4.83728	0.0612166
0.230332	4.84699	4.16728	4.84699	0.0613394
0.230566	4.85781	4.16517	4.85781	0.0614763
0.230777	4.86754	4.16326	4.86754	0.0615995
0.231012	4.87838	4.16115	4.87838	0.0617366
0.231224	4.88815	4.15924	4.88815	0.0618603
0.231459	4.89901	4.15712	4.89901	0.0619978
0.231696	4.90985	4.155	4.90985	0.0621349
0.231932	4.92069	4.15288	4.92069	0.062272
0.23217	4.93122	4.15076	4.93122	0.0624053
0.232407	4.94163	4.14863	4.94163	0.0625371
0.232622	4.95098	4.14672	4.95098	0.0626554
0.23286	4.96133	4.1446	4.96133	0.0627864
0.2331	4.97166	4.14247	4.97166	0.062917
0.233339	4.98196	4.14034	4.98196	0.0630474
0.233555	4.99121	4.13843	4.99121	0.0631645
0.233796	5.00151	4.1363	5.00151	0.0632949
0.234013	5.01081	4.13438	5.01081	0.0634125
0.234254	5.02115	4.13225	5.02115	0.0635435
0.234496	5.03153	4.13011	5.03153	0.0636748
0.234739	5.04193	4.12798	5.04193	0.0638064
0.234958	5.05131	4.12606	5.05131	0.0639251
0.235201	5.06175	4.12392	5.06175	0.0640572
0.235421	5.07117	4.122	5.07117	0.0641764
0.235665	5.08165	4.11986	5.08165	0.064309
0.235885	5.09109	4.11793	5.09109	0.0644285
0.236131	5.10158	4.11579	5.10158	0.0645612
0.236377	5.11207	4.11365	5.11207	0.064694
0.236623	5.12258	4.11151	5.12258	0.0648271
0.23687	5.13308	4.10937	5.13308	0.0649599
0.237093	5.14251	4.10744	5.14251	0.0650793
0.237341	5.15298	4.10529	5.15298	0.0652117
0.237564	5.1624	4.10336	5.1624	0.065331
0.237813	5.17284	4.10121	5.17284	0.065463
0.238063	5.18322	4.09906	5.18322	0.0655944
0.238313	5.19345	4.09691	5.19345	0.0657238
0.238538	5.20256	4.09497	5.20256	0.0658391
0.238789	5.21263	4.09282	5.21263	0.0659666
0.239015	5.22157	4.09088	5.22157	0.0660798
0.239267	5.23142	4.08873	5.23142	0.0662044
0.239495	5.24024	4.08679	5.24024	0.066316
0.239722	5.24905	4.08485	5.24905	0.0664275
0.240001	5.25982	4.08247	5.25982	0.0665638
0.24023	5.26863	4.08053	5.26863	0.0666754
0.240484	5.27845	4.07837	5.27845	0.0667995
0.240739	5.28828	4.07621	5.28828	0.0669239
0.240995	5.29815	4.07405	5.29815	0.0670489
0.241225	5.30705	4.0721	5.30705	0.0671615
0.241482	5.31696	4.06994	5.31696	0.0672869
0.241714	5.32587	4.06799	5.32587	0.0673997
0.241997	5.33675	4.0656	5.33675	0.0675374
0.242255	5.34664	4.06344	5.34664	0.0676625
0.242514	5.35651	4.06127	5.35651	0.0677874
0.242748	5.36537	4.05931	5.36537	0.0678995
0.243034	5.37602	4.05692	5.37602	0.0680343
0.243268	5.38468	4.05497	5.38468	0.0681439
0.243529	5.39423	4.0528	5.39423	0.0682648
0.243764	5.40283	4.05084	5.40283	0.0683737
0.244026	5.41239	4.04866	5.41239	0.0684947
0.244263	5.42099	4.0467	5.42099	0.0686035
0.244526	5.43053	4.04452	5.43053	0.0687242
0.244763	5.43911	4.04256	5.43911	0.0688327
0.245001	5.44769	4.0406	5.44769	0.0689414
0.245266	5.45723	4.03842	5.45723	0.0690621
0.245558	5.46773	4.03602	5.46773	0.069195
0.24577	5.4754	4.03427	5.4754	0.069292
0.246037	5.48498	4.03209	5.48498	0.0694132
0.246304	5.49456	4.0299	5.49456	0.0695345
0.246571	5.50416	4.02771	5.50416	0.069656
0.246813	5.51282	4.02574	5.51282	0.0697656
0.247055	5.52152	4.02377	5.52152	0.0698757
0.247324	5.53119	4.02158	5.53119	0.069998
0.247594	5.54083	4.01939	5.54083	0.07012
0.247864	5.55046	4.0172	5.55046	0.0702419
0.248108	5.55916	4.01522	5.55916	0.070352
0.248379	5.56883	4.01303	5.56883	0.0704744
0.248651	5.57853	4.01083	5.57853	0.0705971
0.248924	5.58826	4.00864	5.58826	0.0707203
0.249197	5.59802	4.00644	5.59802	0.0708438
0.249471	5.60778	4.00424	5.60778	0.0709674
0.249718	5.6166	4.00226	5.6166	0.0710789
0.249993	5.6264	4.00005	5.6264	0.0712029
0.250269	5.63619	3.99785	5.63619	0.0713268
0.250573	5.64695	3.99542	5.64695	0.071463
0.250822	5.65576	3.99344	5.65576	0.0715745
0.2511	5.66555	3.99123	5.66555	0.0716984
0.25135	5.67437	3.98924	5.67437	0.0718099
0.251601	5.68318	3.98726	5.68318	0.0719215
0.25188	5.69298	3.98504	5.69298	0.0720455
0.252132	5.70181	3.98305	5.70181	0.0721573
0.252412	5.71164	3.98084	5.71164	0.0722817
0.252693	5.72147	3.97863	5.72147	0.0724061
0.252975	5.73131	3.97641	5.73131	0.0725306
0.253229	5.74017	3.97442	5.74017	0.0726427
0.253512	5.75	3.9722	5.75	0.0727671
0.253767	5.75886	3.9702	5.75886	0.0728793
0.254051	5.76871	3.96798	5.76871	0.0730039
0.254307	5.77755	3.96598	5.77755	0.0731158
0.254592	5.78736	3.96376	5.78736	0.0732399
0.25485	5.79611	3.96176	5.79611	0.0733507
0.255107	5.80483	3.95976	5.80483	0.073461
0.255366	5.81353	3.95775	5.81353	0.0735711
0.255653	5.82318	3.95553	5.82318	0.0736933
0.255913	5.83188	3.95352	5.83188	0.0738034
0.256202	5.84151	3.95129	5.84151	0.0739251
0.256462	5.85015	3.94928	5.85015	0.0740346
0.256752	5.85973	3.94705	5.85973	0.0741557
0.257043	5.86927	3.94482	5.86927	0.0742765
0.257305	5.87786	3.94281	5.87786	0.0743852
0.257627	5.88835	3.94035	5.88835	0.074518
0.25789	5.89696	3.93834	5.89696	0.0746269
0.258183	5.90652	3.9361	5.90652	0.074748
0.258477	5.91608	3.93386	5.91608	0.0748689
0.258743	5.9247	3.93184	5.9247	0.074978
0.259038	5.9343	3.9296	5.9343	0.0750994
0.259334	5.9439	3.92736	5.9439	0.0752209
0.259631	5.95351	3.92511	5.95351	0.0753425
0.259928	5.96316	3.92287	5.96316	0.0754647
0.260226	5.97281	3.92062	5.97281	0.0755868
0.260525	5.98249	3.91837	5.98249	0.0757093
0.260824	5.99208	3.91612	5.99208	0.0758306
0.261124	6.00162	3.91387	6.00162	0.0759514
0.261395	6.0102	3.91184	6.0102	0.0760599
0.261726	6.02068	3.90937	6.02068	0.0761926
0.262028	6.03018	3.90711	6.03018	0.0763128
0.262331	6.03963	3.90486	6.03963	0.0764324
0.262635	6.04893	3.9026	6.04893	0.0765502
0.262939	6.05813	3.90034	6.05813	0.0766666
0.263244	6.06731	3.89808	6.06731	0.0767828
0.26355	6.07645	3.89582	6.07645	0.0768984
0.263856	6.08554	3.89356	6.08554	0.0770134
0.264163	6.09465	3.89129	6.09465	0.0771287
0.264502	6.10468	3.8888	6.10468	0.0772557
0.26478	6.11284	3.88676	6.11284	0.0773589
0.265089	6.12188	3.88449	6.12188	0.0774732
0.26543	6.13165	3.882	6.13165	0.077597
0.265741	6.14027	3.87973	6.14027	0.0777061
0.266052	6.14868	3.87745	6.14868	0.0778125
0.266364	6.15701	3.87518	6.15701	0.0779179
0.266677	6.16528	3.87291	6.16528	0.0780225
0.26696	6.17262	3.87086	6.17262	0.0781154
0.267242	6.17986	3.86881	6.17986	0.0782071
0.267557	6.18776	3.86653	6.18776	0.078307
0.267842	6.19483	3.86448	6.19483	0.0783964
0.268126	6.20188	3.86243	6.20188	0.0784857
0.268475	6.21052	3.85992	6.21052	0.0785951
0.268793	6.21839	3.85763	6.21839	0.0786947
0.26908	6.22546	3.85558	6.22546	0.0787841
0.269399	6.23333	3.85329	6.23333	0.0788837
0.269688	6.24043	3.85123	6.24043	0.0789735
0.27004	6.24913	3.84871	6.24913	0.0790837
0.27033	6.25627	3.84665	6.25627	0.079174
0.27062	6.26343	3.84459	6.26343	0.0792646
0.270943	6.2714	3.8423	6.2714	0.0793655
0.271267	6.27938	3.84	6.27938	0.0794665
0.271591	6.28737	3.83771	6.28737	0.0795676
0.271917	6.29538	3.83541	6.29538	0.0796689
0.272243	6.30341	3.83311	6.30341	0.0797706
0.27257	6.31147	3.83081	6.31147	0.0798726
0.272898	6.31957	3.82851	6.31957	0.0799751
0.273193	6.32688	3.82644	6.32688	0.0800676
0.273523	6.33502	3.82414	6.33502	0.0801706
0.273853	6.34317	3.82183	6.34317	0.0802737
0.274183	6.35131	3.81953	6.35131	0.0803768
0.274515	6.35946	3.81722	6.35946	0.08048
0.274847	6.36763	3.81491	6.36763	0.0805833
0.275181	6.3758	3.8126	6.3758	0.0806867
0.275515	6.38397	3.81029	6.38397	0.0807901
0.27585	6.39208	3.80797	6.39208	0.0808928
0.276185	6.40014	3.80566	6.40014	0.0809947
0.276522	6.4081	3.80334	6.4081	0.0810955
0.276859	6.41603	3.80102	6.41603	0.0811958
0.277197	6.42395	3.79871	6.42395	0.0812961
0.277502	6.43109	3.79662	6.43109	0.0813864
0.277876	6.43981	3.79406	6.43981	0.0814968
0.278182	6.44693	3.79197	6.44693	0.0815869
0.278524	6.45485	3.78965	6.45485	0.0816871
0.278866	6.46276	3.78732	6.46276	0.0817872
0.279209	6.47066	3.78499	6.47066	0.0818872
0.279553	6.47857	3.78267	6.47857	0.0819873
0.279898	6.48645	3.78034	6.48645	0.082087
0.280243	6.49432	3.778	6.49432	0.0821866
0.28059	6.50219	3.77567	6.50219	0.0822862
0.280937	6.51005	3.77334	6.51005	0.0823857
0.281285	6.51785	3.771	6.51785	0.0824844
0.281634	6.52564	3.76866	6.52564	0.0825829
0.281984	6.53337	3.76632	6.53337	0.0826807
0.282335	6.54102	3.76398	6.54102	0.0827776
0.282687	6.54868	3.76164	6.54868	0.0828745
0.283039	6.55629	3.7593	6.55629	0.0829709
0.283392	6.56381	3.75695	6.56381	0.083066
0.283711	6.57055	3.75484	6.57055	0.0831513
0.284102	6.57873	3.75226	6.57873	0.0832548
0.284422	6.58539	3.75015	6.58539	0.0833391
0.284815	6.59342	3.74756	6.59342	0.0834407
0.285137	6.5999	3.74544	6.5999	0.0835227
0.28546	6.60633	3.74333	6.60633	0.0836041
0.285783	6.61273	3.74121	6.61273	0.0836851
0.286143	6.61976	3.73885	6.61976	0.083774
0.286505	6.62673	3.73649	6.62673	0.0838623
0.286831	6.633	3.73437	6.633	0.0839416
0.28723	6.64064	3.73177	6.64064	0.0840383
0.287594	6.6476	3.72941	6.6476	0.0841264
0.287922	6.65386	3.72728	6.65386	0.0842056
0.288288	6.66082	3.72492	6.66082	0.0842936
0.288654	6.66777	3.72255	6.66777	0.0843817
0.288985	6.67404	3.72042	6.67404	0.084461
0.289354	6.68099	3.71805	6.68099	0.084549
0.289723	6.68791	3.71568	6.68791	0.0846365
0.290093	6.69481	3.71331	6.69481	0.0847238
0.290465	6.70169	3.71094	6.70169	0.0848108
0.290799	6.70789	3.7088	6.70789	0.0848893
0.291173	6.71476	3.70642	6.71476	0.0849763
0.291547	6.72155	3.70404	6.72155	0.0850623
0.291922	6.72806	3.70166	6.72806	0.0851446
0.292297	6.7344	3.69928	6.7344	0.0852248
0.292674	6.74067	3.6969	6.74067	0.0853041
0.293052	6.74685	3.69452	6.74685	0.0853824
0.293431	6.75289	3.69213	6.75289	0.0854588
0.293773	6.75808	3.68998	6.75808	0.0855246
0.294154	6.76362	3.68759	6.76362	0.0855946
0.294535	6.76911	3.6852	6.76911	0.0856641
0.294918	6.77458	3.68281	6.77458	0.0857333
0.295302	6.78003	3.68042	6.78003	0.0858023
0.295687	6.78549	3.67802	6.78549	0.0858714
0.296072	6.79098	3.67562	6.79098	0.0859408
0.296459	6.79645	3.67323	6.79645	0.0860101
0.296847	6.80194	3.67083	6.80194	0.0860795
0.297197	6.80687	3.66867	6.80687	0.0861419
0.297586	6.81233	3.66626	6.81233	0.086211
0.297977	6.81777	3.66386	6.81777	0.0862799
0.298369	6.82318	3.66145	6.82318	0.0863484
0.298722	6.82804	3.65929	6.82804	0.0864099
0.299155	6.83399	3.65664	6.83399	0.0864851
0.29951	6.83882	3.65447	6.83882	0.0865463
0.299906	6.84411	3.65205	6.84411	0.0866132
0.300263	6.84868	3.64988	6.84868	0.0866711
0.300661	6.85365	3.64747	6.85365	0.086734
0.30106	6.85855	3.64505	6.85855	0.086796
0.30146	6.86333	3.64263	6.86333	0.0868564
0.30182	6.86758	3.64045	6.86758	0.0869103
0.302222	6.87226	3.63803	6.87226	0.0869694
0.302625	6.87687	3.63561	6.87687	0.0870278
0.303029	6.88137	3.63319	6.88137	0.0870848
0.303434	6.88575	3.63076	6.88575	0.0871402
0.303841	6.89012	3.62833	6.89012	0.0871955
0.304248	6.89447	3.6259	6.89447	0.0872506
0.304656	6.89879	3.62347	6.89879	0.0873052
0.305066	6.90305	3.62104	6.90305	0.0873591
0.305476	6.90727	3.6186	6.90727	0.0874126
0.305847	6.91101	3.61641	6.91101	0.0874598
0.30626	6.91516	3.61397	6.91516	0.0875123
0.306632	6.91883	3.61178	6.91883	0.0875588
0.307088	6.92317	3.6091	6.92317	0.0876138
0.307504	6.92706	3.60665	6.92706	0.087663
0.307922	6.93091	3.60421	6.93091	0.0877116
0.30834	6.93473	3.60176	6.93473	0.08776
0.308717	6.93815	3.59956	6.93815	0.0878034
0.309138	6.94195	3.59711	6.94195	0.0878515
0.309559	6.9457	3.59466	6.9457	0.0878989
0.309982	6.94941	3.59221	6.94941	0.0879458
0.310406	6.95312	3.58976	6.95312	0.0879928
0.310831	6.95684	3.5873	6.95684	0.0880399
0.311172	6.95982	3.58533	6.95982	0.0880775
0.311642	6.9639	3.58263	6.9639	0.0881292
0.312028	6.96723	3.58042	6.96723	0.0881713
0.312457	6.97096	3.57795	6.97096	0.0882185
0.312845	6.97431	3.57574	6.97431	0.0882609
0.313277	6.97801	3.57327	6.97801	0.0883078
0.31371	6.98167	3.5708	6.98167	0.088354
0.3141	6.98495	3.56858	6.98495	0.0883956
0.314536	6.98854	3.56611	6.98854	0.0884411
0.314972	6.99211	3.56364	6.99211	0.0884862
0.31541	6.99567	3.56117	6.99567	0.0885312
0.315849	6.99922	3.55869	6.99922	0.0885761
0.316289	7.00274	3.55621	7.00274	0.0886207
0.31673	7.0063	3.55374	7.0063	0.0886658
0.317173	7.00989	3.55126	7.00989	0.0887112
0.317572	7.01314	3.54902	7.01314	0.0887523
0.318017	7.0167	3.54654	7.0167	0.0887974
0.318419	7.01991	3.5443	7.01991	0.0888379
0.318866	7.02344	3.54181	7.02344	0.0888827
0.319315	7.02698	3.53932	7.02698	0.0889274
0.319765	7.03048	3.53683	7.03048	0.0889718
0.320171	7.03365	3.53459	7.03365	0.0890119
0.320623	7.03715	3.5321	7.03715	0.0890562
0.321077	7.04063	3.5296	7.04063	0.0891003
0.321531	7.044	3.5271	7.044	0.0891429
0.321942	7.04692	3.52486	7.04692	0.0891798
0.322399	7.05006	3.52235	7.05006	0.0892196
0.322858	7.05312	3.51985	7.05312	0.0892583
0.323318	7.0561	3.51735	7.0561	0.089296
0.323733	7.05876	3.51509	7.05876	0.0893296
0.324195	7.06169	3.51258	7.06169	0.0893668
0.324659	7.06456	3.51007	7.06456	0.0894031
0.325124	7.06735	3.50756	7.06735	0.0894384
0.325544	7.06983	3.5053	7.06983	0.0894698
0.326011	7.07258	3.50279	7.07258	0.0895046
0.326433	7.07506	3.50052	7.07506	0.0895359
0.326903	7.07776	3.498	7.07776	0.0895701
0.327328	7.08016	3.49574	7.08016	0.0896005
0.3278	7.08279	3.49321	7.08279	0.0896337
0.328275	7.08538	3.49069	7.08538	0.0896665
0.328702	7.08769	3.48842	7.08769	0.0896958
0.329179	7.09021	3.48589	7.09021	0.0897276
0.329657	7.09273	3.48336	7.09273	0.0897595
0.330137	7.09524	3.48083	7.09524	0.0897913
0.330618	7.09773	3.4783	7.09773	0.0898228
0.3311	7.10017	3.47577	7.10017	0.0898537
0.331584	7.10258	3.47323	7.10258	0.0898842
0.33202	7.1047	3.47095	7.1047	0.089911
0.332507	7.10704	3.46841	7.10704	0.0899407
0.332994	7.1094	3.46586	7.1094	0.0899705
0.333484	7.11175	3.46332	7.11175	0.0900003
0.333974	7.11406	3.46078	7.11406	0.0900295
0.334467	7.11634	3.45823	7.11634	0.0900583
0.33496	7.11856	3.45568	7.11856	0.0900865
0.335455	7.12076	3.45313	7.12076	0.0901142
0.335952	7.12291	3.45058	7.12291	0.0901414
0.33645	7.12504	3.44802	7.12504	0.0901685
0.336949	7.12716	3.44546	7.12716	0.0901952
0.33745	7.12924	3.44291	7.12924	0.0902216
0.337902	7.13112	3.4406	7.13112	0.0902453
0.338406	7.13321	3.43804	7.13321	0.0902718
0.338911	7.1353	3.43548	7.1353	0.0902983
0.339418	7.13738	3.43291	7.13738	0.0903246
0.339978	7.13958	3.43009	7.13958	0.0903525
0.340488	7.14153	3.42752	7.14153	0.0903771
0.340999	7.14341	3.42494	7.14341	0.0904009
0.341512	7.14523	3.42237	7.14523	0.0904239
0.342027	7.147	3.41979	7.147	0.0904464
0.342491	7.14853	3.41747	7.14853	0.0904657
0.343061	7.15035	3.41464	7.15035	0.0904888
0.343528	7.1518	3.41231	7.1518	0.0905071
0.344049	7.15337	3.40973	7.15337	0.090527
0.344571	7.15489	3.40714	7.15489	0.0905462
0.345095	7.15627	3.40456	7.15627	0.0905637
0.345673	7.15769	3.40171	7.15769	0.0905816
0.3462	7.15893	3.39912	7.15893	0.0905974
0.346729	7.1601	3.39652	7.1601	0.0906122
0.34726	7.16122	3.39393	7.16122	0.0906263
0.347792	7.16227	3.39133	7.16227	0.0906396
0.348326	7.16328	3.38873	7.16328	0.0906524
0.348861	7.16426	3.38613	7.16426	0.0906648
0.349398	7.16519	3.38353	7.16519	0.0906765
0.349937	7.1661	3.38092	7.1661	0.090688
0.350477	7.16696	3.37832	7.16696	0.0906989
0.351019	7.16776	3.37571	7.16776	0.090709
0.351563	7.16851	3.37309	7.16851	0.0907186
0.352108	7.16925	3.37048	7.16925	0.0907279
0.352655	7.16999	3.36787	7.16999	0.0907373
0.353149	7.17062	3.36551	7.17062	0.0907453
0.3537	7.17122	3.36289	7.17122	0.0907528
0.354252	7.17176	3.36027	7.17176	0.0907597
0.354861	7.17227	3.35738	7.17227	0.0907661
0.355361	7.17259	3.35502	7.17259	0.0907702
0.355918	7.17292	3.35239	7.17292	0.0907743
0.356533	7.17324	3.3495	7.17324	0.0907784
0.357094	7.17349	3.34687	7.17349	0.0907815
0.357657	7.17367	3.34423	7.17367	0.0907839
0.358221	7.1738	3.3416	7.1738	0.0907855
0.358788	7.17385	3.33896	7.17385	0.0907862
0.359299	7.17388	3.33658	7.17388	0.0907865
0.359925	7.17387	3.33368	7.17387	0.0907864
0.360497	7.17383	3.33103	7.17383	0.0907859
0.361071	7.17375	3.32839	7.17375	0.0907849
0.361646	7.1736	3.32574	7.1736	0.090783
0.362223	7.17335	3.32309	7.17335	0.0907798
0.362802	7.17303	3.32044	7.17303	0.0907757
0.363383	7.17264	3.31778	7.17264	0.0907709
0.363966	7.17219	3.31512	7.17219	0.0907652
0.36455	7.1717	3.31246	7.1717	0.090759
0.365078	7.17125	3.31007	7.17125	0.0907533
0.365725	7.17063	3.30714	7.17063	0.0907455
0.366315	7.17004	3.30447	7.17004	0.0907379
0.366908	7.16944	3.30181	7.16944	0.0907303
0.367502	7.16882	3.29914	7.16882	0.0907225
0.368098	7.16815	3.29647	7.16815	0.0907141
0.368696	7.1674	3.29379	7.1674	0.0907045
0.369295	7.16657	3.29111	7.16657	0.090694
0.369958	7.16555	3.28817	7.16555	0.0906811
0.370562	7.16454	3.28549	7.16454	0.0906683
0.371168	7.16345	3.2828	7.16345	0.0906546
0.371715	7.16239	3.28039	7.16239	0.0906412
0.372386	7.16092	3.27743	7.16092	0.0906226
0.372998	7.15945	3.27474	7.15945	0.0906039
0.373612	7.15784	3.27205	7.15784	0.0905836
0.374166	7.15633	3.26962	7.15633	0.0905645
0.374846	7.15438	3.26666	7.15438	0.0905398
0.375466	7.15253	3.26396	7.15253	0.0905164
0.376088	7.15059	3.26126	7.15059	0.0904918
0.37665	7.1488	3.25883	7.1488	0.0904692
0.377338	7.14656	3.25585	7.14656	0.0904408
0.377967	7.14444	3.25314	7.14444	0.0904139
0.378597	7.14226	3.25043	7.14226	0.0903864
0.37923	7.14006	3.24772	7.14006	0.0903586
0.379864	7.13781	3.24501	7.13781	0.0903301
0.380501	7.1355	3.24229	7.1355	0.0903008
0.38114	7.13308	3.23957	7.13308	0.0902702
0.381781	7.13057	3.23685	7.13057	0.0902384
0.382425	7.12802	3.23413	7.12802	0.0902062
0.38307	7.12543	3.2314	7.12543	0.0901734
0.383718	7.12283	3.22867	7.12283	0.0901404
0.384302	7.12048	3.22622	7.12048	0.0901107
0.384954	7.11781	3.22348	7.11781	0.090077
0.385674	7.12137	3.22048	7.12137	0.0901221
0.38633	7.12496	3.21774	7.12496	0.0901675
0.386989	7.12852	3.215	7.12852	0.0902125
0.387584	7.13169	3.21253	7.13169	0.0902526
0.388313	7.13552	3.20951	7.13552	0.0903011
0.388912	7.13864	3.20704	7.13864	0.0903406
0.389579	7.14212	3.20429	7.14212	0.0903846
0.390316	7.14594	3.20126	7.14594	0.0904329
0.390989	7.14938	3.19851	7.14938	0.0904764
0.391664	7.1528	3.19575	7.1528	0.0905198
0.392341	7.15619	3.193	7.15619	0.0905627
0.39302	7.15958	3.19024	7.15958	0.0906056
0.393702	7.16295	3.18747	7.16295	0.0906482
0.394386	7.16629	3.18471	7.16629	0.0906904
0.395072	7.1696	3.18194	7.1696	0.0907324
0.395761	7.17289	3.17917	7.17289	0.0907739
0.396452	7.17614	3.17639	7.17614	0.0908151
0.397146	7.17937	3.17362	7.17937	0.090856
0.397842	7.1826	3.17084	7.1826	0.0908969
0.398541	7.18582	3.16806	7.18582	0.0909376
0.399242	7.189	3.16528	7.189	0.0909779
0.399945	7.19216	3.16249	7.19216	0.0910179
0.400651	7.19527	3.15971	7.19527	0.0910573
0.40136	7.19834	3.15692	7.19834	0.0910961
0.402071	7.20137	3.15412	7.20137	0.0911345
0.402713	7.20406	3.15161	7.20406	0.0911685
0.4035	7.20728	3.14853	7.20728	0.0912092
0.404147	7.20986	3.14601	7.20986	0.0912419
0.404868	7.21268	3.14321	7.21268	0.0912776
0.405591	7.21542	3.1404	7.21542	0.0913122
0.40639	7.21838	3.13732	7.21838	0.0913496
0.407046	7.22076	3.13479	7.22076	0.0913798
0.407778	7.22337	3.13198	7.22337	0.0914128
0.408585	7.22617	3.12888	7.22617	0.0914482
0.409322	7.22867	3.12606	7.22867	0.09148
0.410061	7.23117	3.12324	7.23117	0.0915115
0.410804	7.23363	3.12042	7.23363	0.0915427
0.411549	7.23605	3.11759	7.23605	0.0915733
0.412296	7.23841	3.11477	7.23841	0.0916032
0.413046	7.24071	3.11194	7.24071	0.0916323
0.413799	7.24293	3.1091	7.24293	0.0916603
0.414555	7.24507	3.10627	7.24507	0.0916874
0.415314	7.24715	3.10343	7.24715	0.0917137
0.416075	7.24916	3.10059	7.24916	0.0917392
0.416763	7.25094	3.09803	7.25094	0.0917618
0.417529	7.25291	3.09518	7.25291	0.0917867
0.418299	7.25481	3.09234	7.25481	0.0918107
0.419149	7.25685	3.0892	7.25685	0.0918365
0.419846	7.25849	3.08663	7.25849	0.0918573
0.420625	7.26028	3.08378	7.26028	0.0918799
0.421405	7.26202	3.08092	7.26202	0.091902
0.422268	7.26391	3.07777	7.26391	0.0919259
0.422976	7.26544	3.07519	7.26544	0.0919452
0.423766	7.2671	3.07232	7.2671	0.0919663
0.424559	7.26874	3.06945	7.26874	0.091987
0.425434	7.2705	3.0663	7.2705	0.0920093
0.426153	7.27191	3.06371	7.27191	0.092027
0.427035	7.27358	3.06054	7.27358	0.0920483
0.427759	7.27494	3.05795	7.27494	0.0920654
0.428567	7.27641	3.05507	7.27641	0.0920841
0.429378	7.27784	3.05218	7.27784	0.0921022
0.430273	7.27939	3.049	7.27939	0.0921217
0.43109	7.28079	3.04611	7.28079	0.0921394
0.431828	7.28204	3.04351	7.28204	0.0921553
0.432652	7.28341	3.04061	7.28341	0.0921726
0.433478	7.28475	3.03771	7.28475	0.0921896
0.43439	7.28617	3.03452	7.28617	0.0922076
0.43514	7.28731	3.0319	7.28731	0.092222
0.435976	7.28854	3.029	7.28854	0.0922376
0.436815	7.28972	3.02609	7.28972	0.0922525
0.437657	7.29084	3.02317	7.29084	0.0922666
0.438503	7.29189	3.02026	7.29189	0.09228
0.439352	7.29288	3.01734	7.29288	0.0922925
0.440204	7.29381	3.01442	7.29381	0.0923043
0.441145	7.29479	3.0112	7.29479	0.0923166
0.442004	7.29561	3.00827	7.29561	0.092327
0.442866	7.29637	3.00534	7.29637	0.0923366
0.443732	7.29707	3.00241	7.29707	0.0923455
0.444601	7.29772	2.99947	7.29772	0.0923537
0.445474	7.2983	2.99653	7.2983	0.0923611
0.44635	7.29882	2.99359	7.29882	0.0923676
0.44723	7.29929	2.99064	7.29929	0.0923737
0.448113	7.29975	2.9877	7.29975	0.0923794
0.448999	7.30016	2.98475	7.30016	0.0923846
0.4498	7.30052	2.98209	7.30052	0.0923892
0.450783	7.30091	2.97884	7.30091	0.092394
0.45159	7.3012	2.97617	7.3012	0.0923978
0.45258	7.30155	2.97291	7.30155	0.0924021
0.453394	7.3018	2.97024	7.3018	0.0924054
0.454301	7.30206	2.96728	7.30206	0.0924087
0.455304	7.30233	2.96401	7.30233	0.092412
0.456127	7.30251	2.96133	7.30251	0.0924144
0.457046	7.30266	2.95835	7.30266	0.0924163
0.457968	7.30277	2.95537	7.30277	0.0924176
0.458987	7.30283	2.95209	7.30283	0.0924184
0.459917	7.30282	2.94911	7.30282	0.0924183
0.460851	7.30277	2.94612	7.30277	0.0924177
0.461788	7.30269	2.94312	7.30269	0.0924167
0.46273	7.30257	2.94013	7.30257	0.0924151
0.46377	7.30238	2.93683	7.30238	0.0924127
0.464719	7.30215	2.93383	7.30215	0.0924098
0.465673	7.3019	2.93082	7.3019	0.0924066
0.46663	7.30161	2.92781	7.30161	0.092403
0.467495	7.30135	2.9251	7.30135	0.0923996
0.46846	7.30103	2.92209	7.30103	0.0923956
0.469526	7.30062	2.91877	7.30062	0.0923904
0.4705	7.30022	2.91575	7.30022	0.0923853
0.471477	7.29979	2.91273	7.29979	0.09238
0.472458	7.29936	2.9097	7.29936	0.0923745
0.473444	7.29893	2.90667	7.29893	0.092369
0.474434	7.29849	2.90364	7.29849	0.0923635
0.475427	7.29803	2.9006	7.29803	0.0923576
0.476525	7.29747	2.89726	7.29747	0.0923506
0.477528	7.29695	2.89421	7.29695	0.0923439
0.478535	7.2964	2.89117	7.2964	0.0923371
0.479546	7.29585	2.88812	7.29585	0.09233
0.480561	7.29527	2.88507	7.29527	0.0923227
0.481479	7.29472	2.88232	7.29472	0.0923157
0.482605	7.29402	2.87895	7.29402	0.0923069
0.483633	7.29336	2.87589	7.29336	0.0922985
0.484769	7.29261	2.87252	7.29261	0.0922891
0.485703	7.29198	2.86975	7.29198	0.0922811
0.486745	7.29125	2.86668	7.29125	0.0922718
0.487791	7.29049	2.86361	7.29049	0.0922622
0.488841	7.2897	2.86053	7.2897	0.0922522
0.489896	7.28885	2.85744	7.28885	0.0922415
0.491062	7.28788	2.85405	7.28788	0.0922292
0.492127	7.28696	2.85096	7.28696	0.0922175
0.493196	7.286	2.84787	7.286	0.0922054
0.49427	7.285	2.84477	7.285	0.0921928
0.495349	7.28395	2.84167	7.28395	0.0921794
0.496433	7.28284	2.83857	7.28284	0.0921655
0.49763	7.2816	2.83515	7.2816	0.0921497
0.498723	7.28044	2.83204	7.28044	0.0921351
0.499822	7.27928	2.82893	7.27928	0.0921204
0.500925	7.27811	2.82582	7.27811	0.0921056
0.501922	7.27706	2.82301	7.27706	0.0920923
0.503034	7.27586	2.81988	7.27586	0.0920771
0.504263	7.2745	2.81644	7.2745	0.0920599
0.505274	7.27338	2.81363	7.27338	0.0920458
0.506401	7.27211	2.81049	7.27211	0.0920296
0.507647	7.27066	2.80704	7.27066	0.0920113
0.508785	7.26932	2.8039	7.26932	0.0919943
0.509928	7.26793	2.80076	7.26793	0.0919767
0.511076	7.26649	2.79761	7.26649	0.0919585
0.51223	7.26502	2.79446	7.26502	0.0919399
0.513505	7.26338	2.79099	7.26338	0.0919191
0.514669	7.26183	2.78783	7.26183	0.0918996
0.515839	7.26023	2.78467	7.26023	0.0918793
0.516896	7.25877	2.78182	7.25877	0.0918608
0.518194	7.25694	2.77833	7.25694	0.0918377
0.519499	7.25509	2.77484	7.25509	0.0918142
0.520571	7.25355	2.77198	7.25355	0.0917947
0.521888	7.25164	2.76848	7.25164	0.0917706
0.52297	7.25007	2.76561	7.25007	0.0917507
0.524178	7.24829	2.76243	7.24829	0.0917282
0.525513	7.2463	2.75892	7.2463	0.091703
0.526732	7.24447	2.75572	7.24447	0.0916799
0.527958	7.24262	2.75252	7.24262	0.0916564
0.529189	7.24077	2.74932	7.24077	0.091633
0.530425	7.23892	2.74611	7.23892	0.0916096
0.531668	7.23704	2.7429	7.23704	0.0915858
0.532916	7.23514	2.73968	7.23514	0.0915618
0.53417	7.23322	2.73647	7.23322	0.0915375
0.535557	7.2311	2.73292	7.2311	0.0915106
0.536824	7.22916	2.7297	7.22916	0.0914861
0.538096	7.2272	2.72647	7.2272	0.0914613
0.539375	7.22524	2.72323	7.22524	0.0914364
0.540531	7.22347	2.72032	7.22347	0.091414
0.541951	7.22127	2.71675	7.22127	0.0913863
0.543248	7.21926	2.71351	7.21926	0.0913608
0.544421	7.21743	2.71058	7.21743	0.0913377
0.54573	7.21539	2.70733	7.21539	0.0913118
0.547177	7.21312	2.70375	7.21312	0.0912831
0.548499	7.21105	2.70049	7.21105	0.091257
0.549828	7.20897	2.69722	7.20897	0.0912306
0.551163	7.20687	2.69395	7.20687	0.0912041
0.552505	7.20476	2.69068	7.20476	0.0911773
0.553988	7.20243	2.68707	7.20243	0.0911478
0.555344	7.20033	2.68379	7.20033	0.0911212
0.556706	7.19824	2.68051	7.19824	0.0910949
0.558075	7.19617	2.67722	7.19617	0.0910686
0.55945	7.1941	2.67393	7.1941	0.0910425
0.560833	7.19203	2.67063	7.19203	0.0910163
0.562222	7.18998	2.66733	7.18998	0.0909903
0.563618	7.18793	2.66402	7.18793	0.0909643
0.565162	7.18568	2.66038	7.18568	0.0909358
0.566431	7.18385	2.6574	7.18385	0.0909127
0.567848	7.18183	2.65408	7.18183	0.0908872
0.569415	7.17964	2.65042	7.17964	0.0908594
0.570848	7.17767	2.6471	7.17767	0.0908345
0.572287	7.17575	2.64377	7.17575	0.0908102
0.573734	7.17387	2.64043	7.17387	0.0907864
0.575188	7.17202	2.63709	7.17202	0.0907629
0.576649	7.17021	2.63375	7.17021	0.0907401
0.578265	7.16824	2.63007	7.16824	0.0907151
0.579742	7.16648	2.62671	7.16648	0.0906929
0.581227	7.16474	2.62336	7.16474	0.0906709
0.582719	7.16303	2.61999	7.16303	0.0906492
0.584068	7.16154	2.61697	7.16154	0.0906304
0.585726	7.15978	2.61326	7.15978	0.0906081
0.587394	7.1581	2.60955	7.1581	0.0905868
0.588765	7.15677	2.60651	7.15677	0.09057
0.590296	7.15534	2.60312	7.15534	0.0905519
0.591836	7.15395	2.59974	7.15395	0.0905343
0.593383	7.15261	2.59635	7.15261	0.0905174
0.595094	7.15117	2.59261	7.15117	0.0904992
0.596659	7.1499	2.58921	7.1499	0.090483
0.598231	7.14866	2.5858	7.14866	0.0904674
0.599812	7.14746	2.58239	7.14746	0.0904522
0.601402	7.14631	2.57898	7.14631	0.0904376
0.60316	7.1451	2.57522	7.1451	0.0904223
0.604767	7.14407	2.57179	7.14407	0.0904092
0.606383	7.14309	2.56836	7.14309	0.0903969
0.608007	7.14215	2.56493	7.14215	0.090385
0.60964	7.14125	2.56149	7.14125	0.0903736
0.611282	7.14041	2.55805	7.14041	0.090363
0.612933	7.13964	2.5546	7.13964	0.0903532
0.614592	7.13891	2.55115	7.13891	0.090344
0.616094	7.13832	2.54804	7.13832	0.0903364
0.617771	7.1377	2.54458	7.1377	0.0903287
0.619626	7.13708	2.54077	7.13708	0.0903208
0.621322	7.13655	2.5373	7.13655	0.0903142
0.623028	7.13611	2.53382	7.13611	0.0903085
0.624743	7.13574	2.53034	7.13574	0.0903038
0.626467	7.13543	2.52686	7.13543	0.0903
0.628201	7.13519	2.52337	7.13519	0.0902969
0.630119	7.13474	2.51952	7.13474	0.0902912
0.631874	7.13096	2.51602	7.13096	0.0902434
0.633638	7.12723	2.51252	7.12723	0.0901962
0.635412	7.12356	2.50901	7.12356	0.0901497
0.637195	7.11994	2.5055	7.11994	0.0901039
0.638989	7.11636	2.50198	7.11636	0.0900586
0.640793	7.11284	2.49845	7.11284	0.0900141
0.642608	7.10939	2.49492	7.10939	0.0899704
0.644432	7.10599	2.49139	7.10599	0.0899273
0.646083	7.10299	2.4882	7.10299	0.0898894
0.648113	7.09937	2.4843	7.09937	0.0898436
0.649968	7.09614	2.48075	7.09614	0.0898027
0.651835	7.09296	2.4772	7.09296	0.0897625
0.653713	7.08983	2.47364	7.08983	0.0897229
0.655601	7.08672	2.47008	7.08672	0.0896835
0.6575	7.08365	2.46651	7.08365	0.0896447
0.659602	7.08031	2.46257	7.08031	0.0896024
0.661524	7.07734	2.45899	7.07734	0.0895648
0.663458	7.07444	2.45541	7.07444	0.0895281
0.665403	7.07161	2.45181	7.07161	0.0894922
0.66736	7.0688	2.44822	7.0688	0.0894567
0.669525	7.06576	2.44426	7.06576	0.0894183
0.671506	7.06306	2.44065	7.06306	0.0893841
0.673499	7.06042	2.43703	7.06042	0.0893507
0.675302	7.0581	2.43378	7.0581	0.0893213
0.677317	7.05556	2.43015	7.05556	0.0892892
0.679548	7.05279	2.42616	7.05279	0.0892541
0.681589	7.05031	2.42253	7.05031	0.0892227
0.683642	7.04789	2.41889	7.04789	0.0891921
0.685707	7.04553	2.41524	7.04553	0.0891623
0.687785	7.04325	2.41159	7.04325	0.0891333
0.689875	7.041	2.40793	7.041	0.0891049
0.69219	7.03858	2.40391	7.03858	0.0890743
0.694307	7.03642	2.40024	7.03642	0.0890469
0.696438	7.03429	2.39656	7.03429	0.08902
0.698581	7.03221	2.39288	7.03221	0.0889936
0.700738	7.03018	2.3892	7.03018	0.0889679
0.70269	7.02836	2.38588	7.02836	0.088945
0.704873	7.02639	2.38218	7.02639	0.0889201
0.707069	7.02446	2.37848	7.02446	0.0888956
0.7095	7.02237	2.3744	7.02237	0.0888691
0.711725	7.02053	2.37069	7.02053	0.0888458
0.713739	7.01892	2.36734	7.01892	0.0888255
0.716216	7.01702	2.36324	7.01702	0.0888014
0.718484	7.01535	2.35951	7.01535	0.0887803
0.720765	7.01376	2.35577	7.01376	0.0887601
0.723061	7.01222	2.35203	7.01222	0.0887407
0.725372	7.01075	2.34828	7.01075	0.0887221
0.727698	7.00931	2.34452	7.00931	0.0887038
0.730039	7.00791	2.34076	7.00791	0.0886861
0.732394	7.00657	2.33699	7.00657	0.0886691
0.734765	7.00529	2.33322	7.00529	0.088653
0.737391	7.00392	2.32906	7.00392	0.0886357
0.739795	7.00274	2.32528	7.00274	0.0886207
0.741971	7.00176	2.32186	7.00176	0.0886083
0.744649	7.00063	2.31768	7.00063	0.088594
0.7471	6.99966	2.31388	6.99966	0.0885817
0.749567	6.99875	2.31007	6.99875	0.0885703
0.752051	6.99792	2.30625	6.99792	0.0885597
0.754551	6.99712	2.30243	6.99712	0.0885496
0.757068	6.99637	2.2986	6.99637	0.0885401
0.759348	6.99578	2.29514	6.99578	0.0885326
0.761897	6.99522	2.2913	6.99522	0.0885256
0.76472	6.9947	2.28707	6.9947	0.088519
0.767306	6.99433	2.28321	6.99433	0.0885142
0.769908	6.99401	2.27935	6.99401	0.0885103
0.772529	6.9938	2.27548	6.9938	0.0885076
0.775167	6.9937	2.2716	6.9937	0.0885064
0.777824	6.9937	2.26772	6.9937	0.0885064
0.780499	6.9938	2.26383	6.9938	0.0885076
0.783192	6.99406	2.25993	6.99406	0.0885109
0.785904	6.99449	2.25603	6.99449	0.0885163
0.788909	6.99511	2.25173	6.99511	0.0885241
0.79166	6.99589	2.24782	6.99589	0.088534
0.794431	6.99686	2.24389	6.99686	0.0885463
0.797222	6.9981	2.23996	6.9981	0.088562
0.800032	6.99962	2.23602	6.99962	0.0885812
0.803146	7.00162	2.23168	7.00162	0.0886065
0.805712	7.00354	2.22813	7.00354	0.0886308
0.808582	7.00602	2.22417	7.00602	0.0886622
0.811473	7.0088	2.2202	7.0088	0.0886974
0.814385	7.01198	2.21623	7.01198	0.0887377
0.817317	7.01559	2.21225	7.01559	0.0887833
0.820568	7.02006	2.20787	7.02006	0.0888399
0.823545	7.02471	2.20387	7.02471	0.0888987
0.826544	7.02991	2.19987	7.02991	0.0889645
0.829565	7.03595	2.19586	7.03595	0.089041
0.832608	7.01385	2.19184	7.01385	0.0887614
0.835674	6.87918	2.18782	6.87918	0.0870571
0.838762	6.75109	2.18379	6.75109	0.0854361
0.841873	6.62941	2.17975	6.62941	0.0838962
0.845322	6.50268	2.1753	6.50268	0.0822924
0.848482	6.39395	2.17124	6.39395	0.0809164
0.851347	6.30183	2.16759	6.30183	0.0797506
0.854874	6.19654	2.16311	6.19654	0.0784181
0.858106	6.10837	2.15903	6.10837	0.0773023
0.861036	6.03541	2.15536	6.03541	0.076379
0.864315	5.89215	2.15127	5.89215	0.0745661
0.86795	5.64321	2.14676	5.64321	0.0714157
0.871282	5.43909	2.14265	5.43909	0.0688325
0.87464	5.25372	2.13853	5.25372	0.0664866
0.878023	5.21664	2.13441	5.21664	0.0660173
0.881433	5.27364	2.13027	5.27364	0.0667387
0.885215	5.33891	2.12572	5.33891	0.0675648
0.888681	5.40046	2.12157	5.40046	0.0683436
0.892174	5.46382	2.11741	5.46382	0.0691454
0.895695	5.52915	2.11325	5.52915	0.0699722
0.899243	5.59635	2.10907	5.59635	0.0708226
0.903179	5.6722	2.10447	5.6722	0.0717825
0.906788	5.74287	2.10028	5.74287	0.0726769
0.91006	5.80769	2.0965	5.80769	0.0734972
0.914092	5.88817	2.09187	5.88817	0.0745157
0.917417	5.95498	2.08808	5.95498	0.0753611
0.921514	6.0375	2.08343	6.0375	0.0764054
0.925271	6.11328	2.0792	6.11328	0.0773645
0.929059	6.18965	2.07495	6.18965	0.0783309
0.932877	6.26642	2.0707	6.26642	0.0793025
0.936727	6.34359	2.06644	6.34359	0.080279
0.940609	6.42109	2.06217	6.42109	0.0812599
0.944917	6.50671	2.05747	6.50671	0.0823434
0.948867	6.58487	2.05318	6.58487	0.0833325
0.952851	6.66328	2.04889	6.66328	0.0843248
0.956868	6.74189	2.04458	6.74189	0.0853196
0.960919	6.82067	2.04027	6.82067	0.0863165
0.965415	6.90749	2.03551	6.90749	0.0874153
0.969125	6.97875	2.03161	6.97875	0.0883171
0.97328	7.05805	2.02727	7.05805	0.0893207
0.977472	7.13753	2.02292	7.13753	0.0903265
0.982125	7.22509	2.01812	7.22509	0.0914346
0.986393	7.30486	2.01375	7.30486	0.0924441
0.990698	7.38473	2.00937	7.38473	0.0934548
0.995042	7.46471	2.00498	7.46471	0.094467
0.999423	7.54483	2.00058	7.54483	0.0954809
1.00384	7.62506	1.99617	7.62506	0.0964962
1.00875	7.71337	1.99131	7.71337	0.0976139
1.01325	7.79378	1.98688	7.79378	0.0986315
